# Supplementary material for: Targeting the KLF5-EphA2 axis can restrain cancer stemness and overcome chemoresistance in basal-like breast cancer
Source: Int J Biol Sci. 2023 Mar 21;19(6):1861–74. doi: 10.7150/ijbs.82567 (PMC10092769; doi:10.7150/ijbs.82567)
Supplement: Supplementary file 1 — Supplementary figures and tables. [file ijbsv19p1861s1.pdf]

***Supplementary Data for:***

**Targeting the KLF5-EphA2 axis can restrain cancer stemness and overcome chemoresistance in basal like breast cancer**

Ping Zhao<sup>1,#</sup>, Jian Sun<sup>1,#</sup>, Yiyin Tang<sup>1,#</sup>, Xiangwu Zhang<sup>1</sup>, Xin Liu<sup>1</sup>, Rong Liu<sup>3</sup>, Guangshi Du<sup>4</sup>, Wenqiang Gan<sup>2</sup>, Chuanyu Yang<sup>2</sup>, Ceshi Chen<sup>1,2,5\*</sup>, Dewei Jiang<sup>2,6\*</sup>

*1 The Third Affiliated Hospital, Kunming Medical University, Kunming, 650118 China*

*2 Key Laboratory of Animal Models and Human Disease Mechanisms of the Chinese Academy of Sciences and Yunnan Province, Kunming Institute of Zoology, Chinese Academy of Sciences, Kunming, 650201 China*

*3 Translational Cancer Research Center, Peking University First Hospital, Beijing, 100034 China*

*4 Translational Medicine Research Center, Guizhou Medical University, Guiyang, 550025 China*

*5 Academy of Biomedical Engineering, Kunming Medical University, Kunming, 650500 China*

*6 Kunming College of Life Sciences, University of the Chinese Academy of Sciences, Kunming, 650204 China*

**This file includes:**

✧ **Supplementary Figures S1-S12**

✧ **Supplementary Tables 1-2**

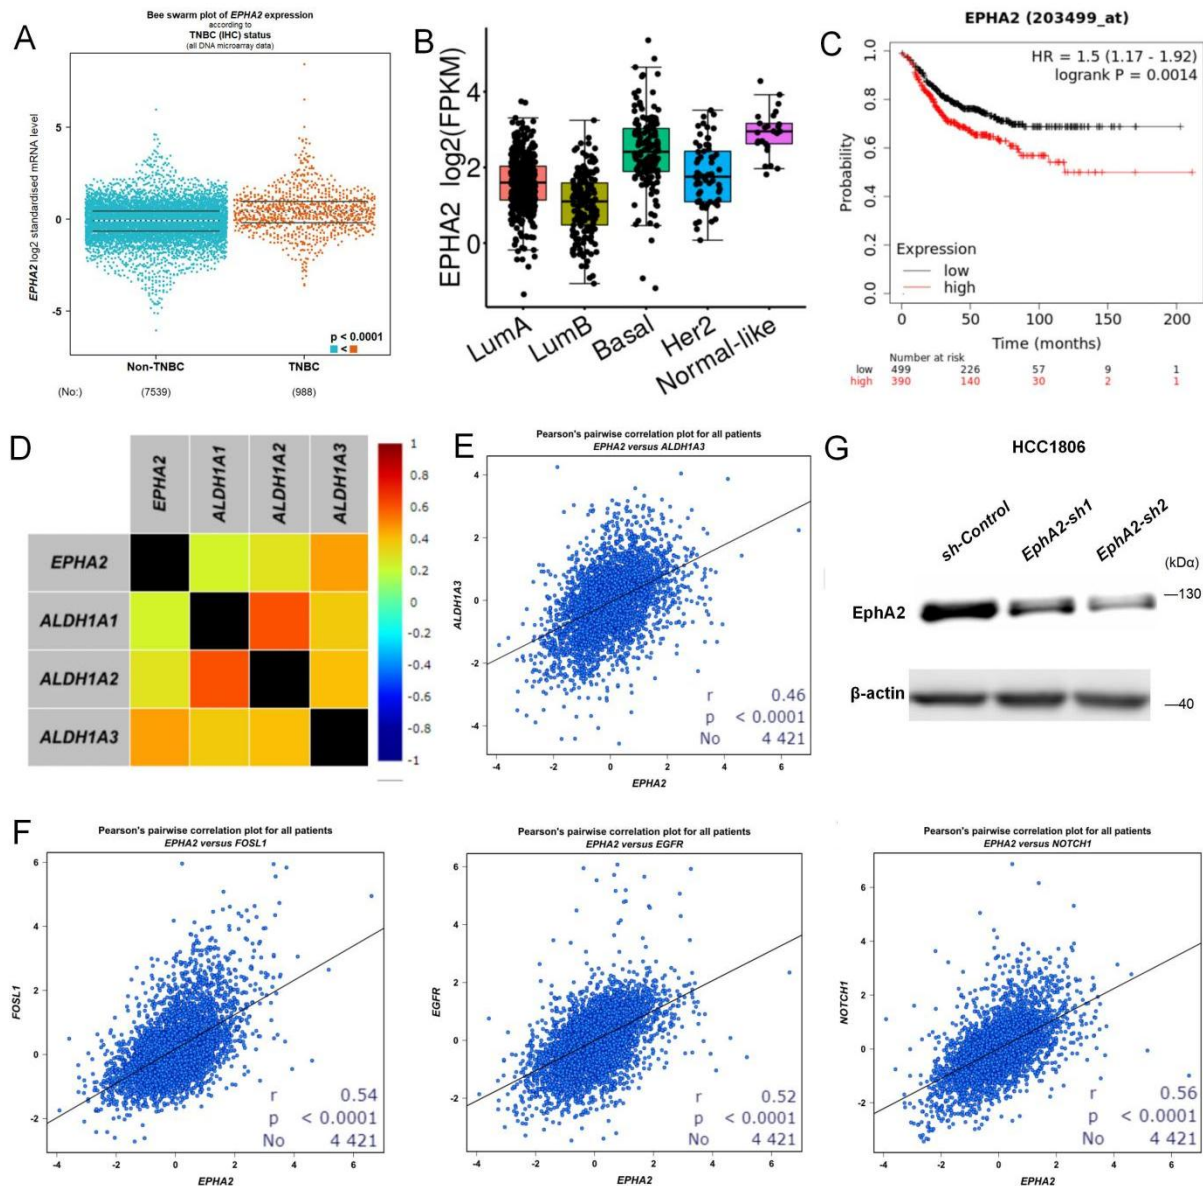

**Figure S1. EphA2 is associated with poor prognosis and breast cancer cell stemness in breast cancer patients.**

A. According to database analysis (bc-GenExMiner v4.9), EphA2 was found to be highly expressed in basal-like type patients and expressed at low levels in non-basal-like type patients; B. TCGA database analysis revealed that the mRNA level of *Epha2* was highly expressed in basal-like type patients; C. High expression of EphA2 was positively correlated with poor prognosis of breast cancer patients (Kaplan Meier-Plotter); D-E. The expression level of EphA2 was positively correlated

with ALDH1A1-3 (bc-GenExMiner v4.9); F. The expression level of *EphA2* was positively correlated with *FOSL1*, *EGFR*, and *NOTCH1* (bc-GenExMiner v4.9); G. WB validation of stable knockdown of EphA2 in HCC1806 cells by two independent shRNAs.

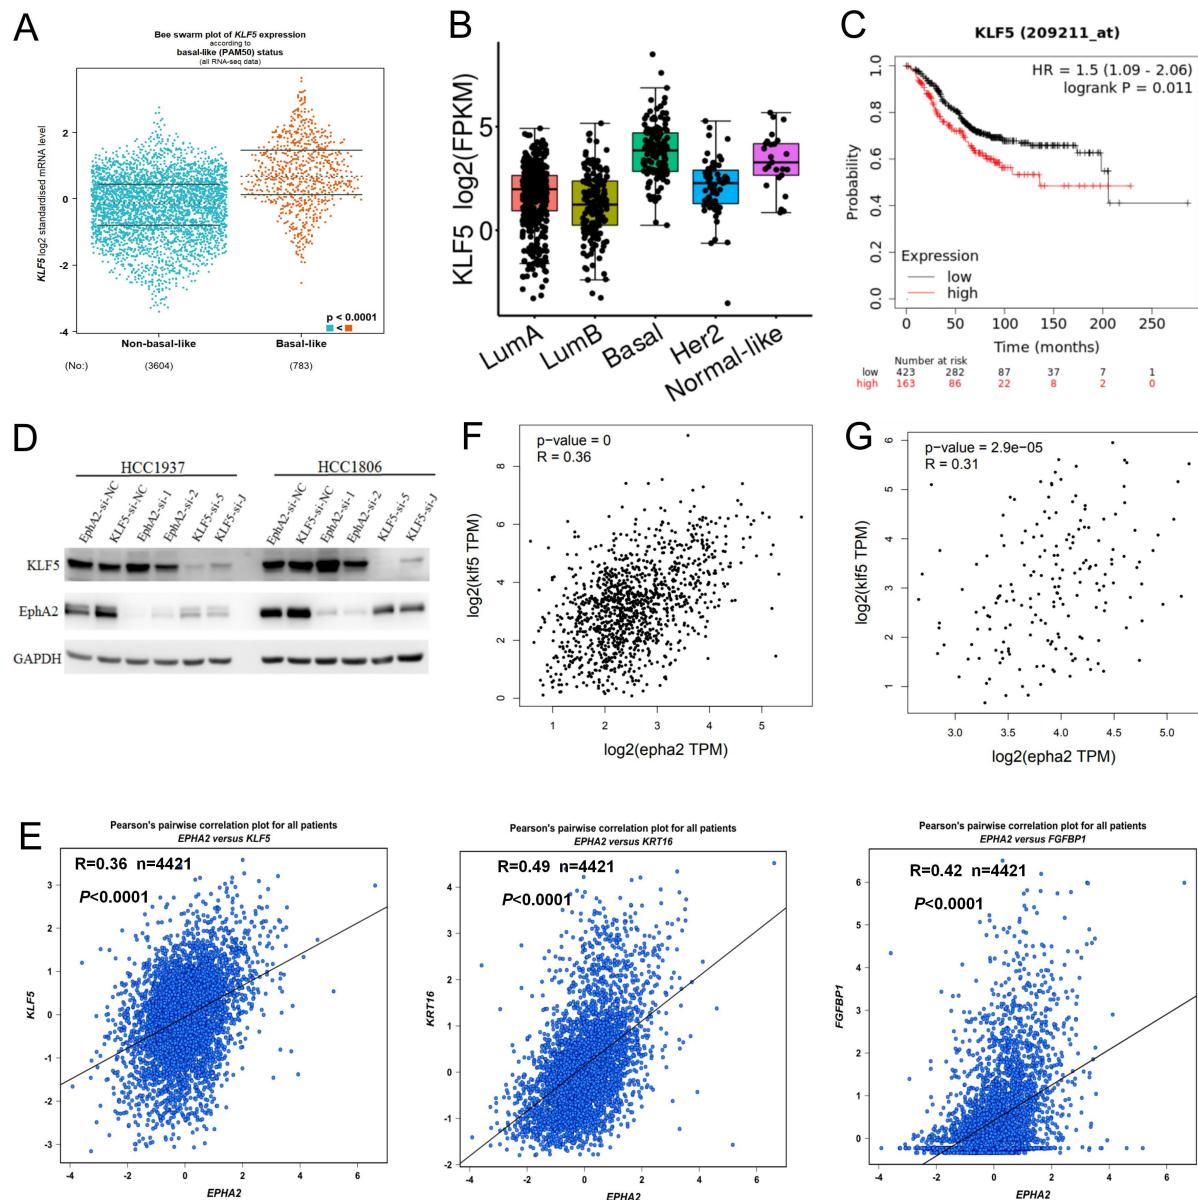

**Figure S2. Positive correlation between EphA2 and KLF5 expression in breast cancer.**

A. According to database analysis (bc-GenExMiner v4.9), KLF5 was found to be highly expressed in basal-like type patients and expressed at low levels in non-basal-like type patients; B. TCGA database analysis revealed that the mRNA level of *KLF5* was highly expressed in basal-like type patients; C. High expression of KLF5 was positively correlated with poor prognosis of high-grade breast cancer patients (Kaplan Meier-Plotter); D. The knockdown of KLF5 in HCC1937 and

HCC1806 could inhibit the expression of EphA2, but the knockdown of EphA2 did not affect the expression of KLF5; E. In the analysis of all breast cancer patients in the database (bc-GenExMiner v4.9, n=4421), it was found that the expression trends of EphA2 and KLF5, KRT16, and FGF-BP1 were consistent, all positively correlated ( $R=0.36$ ,  $0.49$ , and  $0.42$ , respectively); F-G. EphA2 was positively correlated with KLF5 expression in the TCGA (F) and GTEx (G) databases.

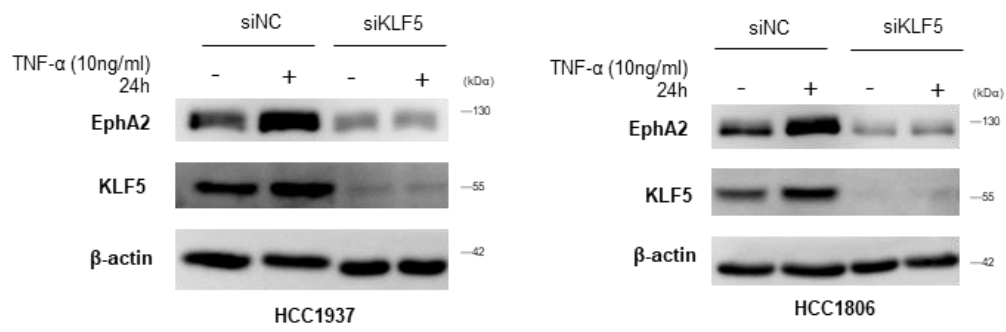

**Figure S3. Knockdown of KLF5 inhibits TNF $\alpha$ -induced EphA2 expression**

Knockdown of KLF5 in HCC1937 (left) and HCC1806 (right) cells with the addition of TNF $\alpha$  for detection of EphA2 and KLF5 expression by WB.

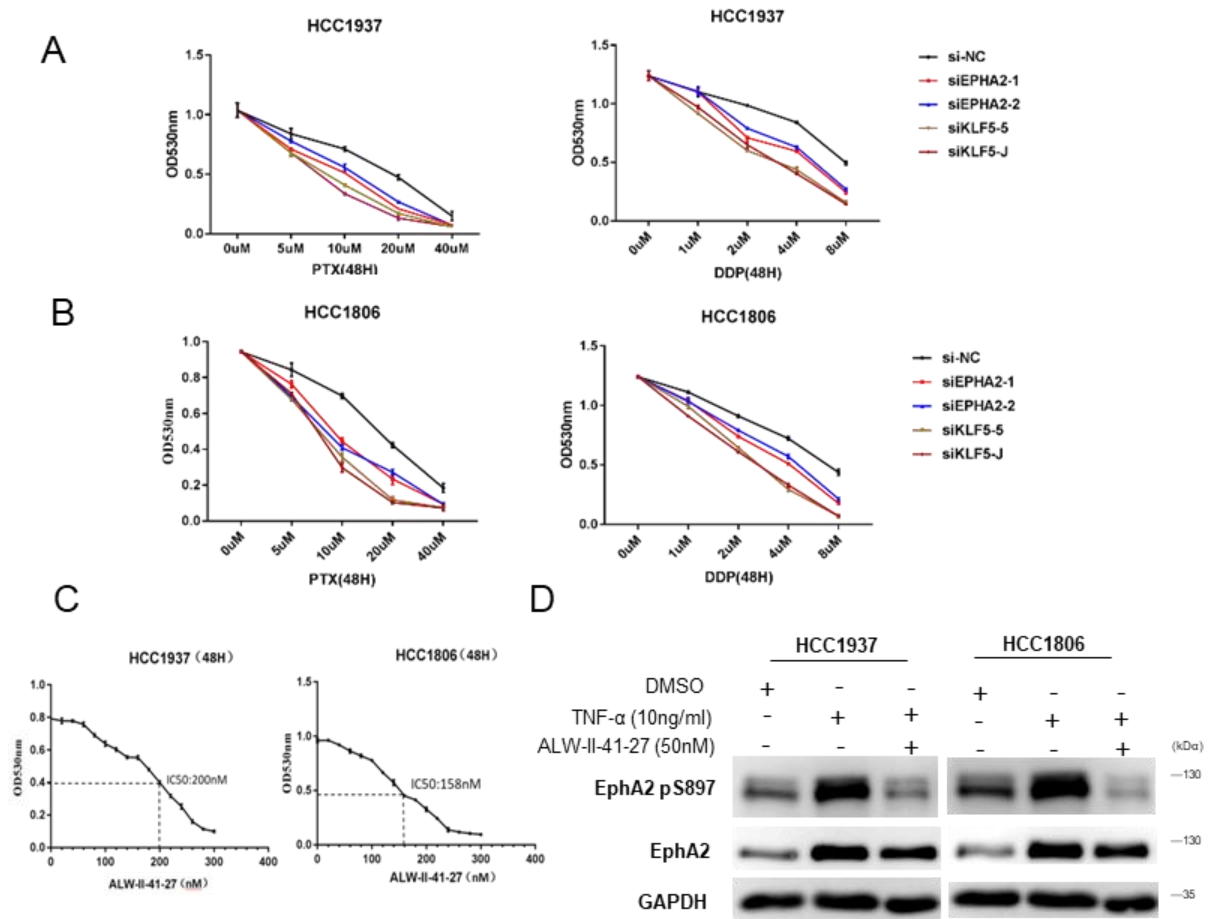

**Figure S4. ALW-II-41-27 inhibited BLBC cells.**

A-B. Detection of tolerance to PTX and DDP after knockdown of *EphA2* or *KLF5* in HCC1937 (A) and HCC1806 cells (B), respectively; C. Determination of IC<sub>50</sub> of HCC1937 and HCC1806 cells against ALW-II-41-27 by SRB assays; D. Detection of expression of EphA2 and EphA2 pS897 by WB after treatment of HCC1937 and HCC1806 cells with TNF $\alpha$  (10 ng/mL) alone or in combination with ALW-II-41-27 (50 nM) for 24 h.

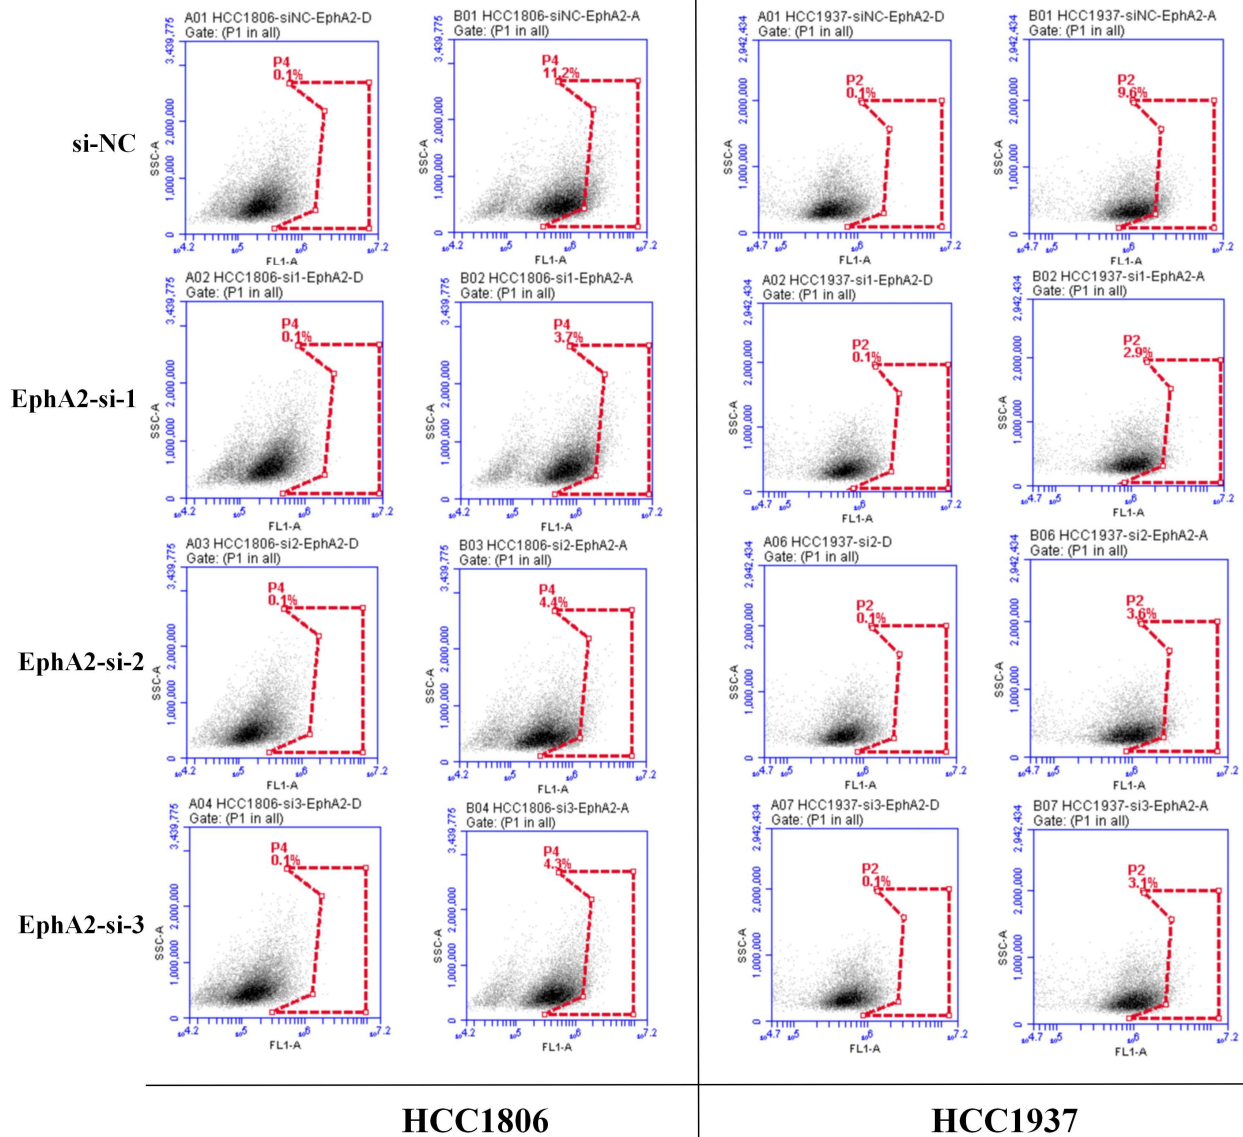

**Figure S5. Representative images for flow cytometry analysis for Figure 1D-E.**

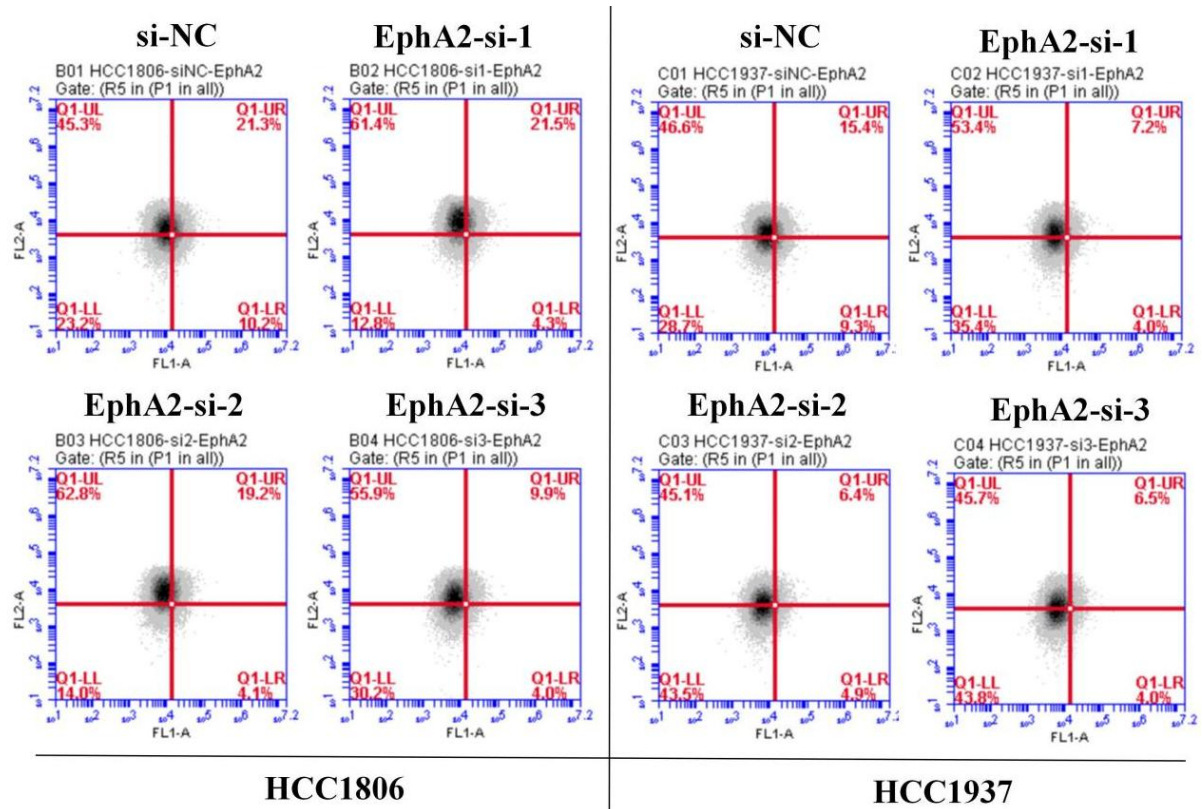

**Figure S6. Representative images for flow cytometry analysis for Figure 1F-G.**

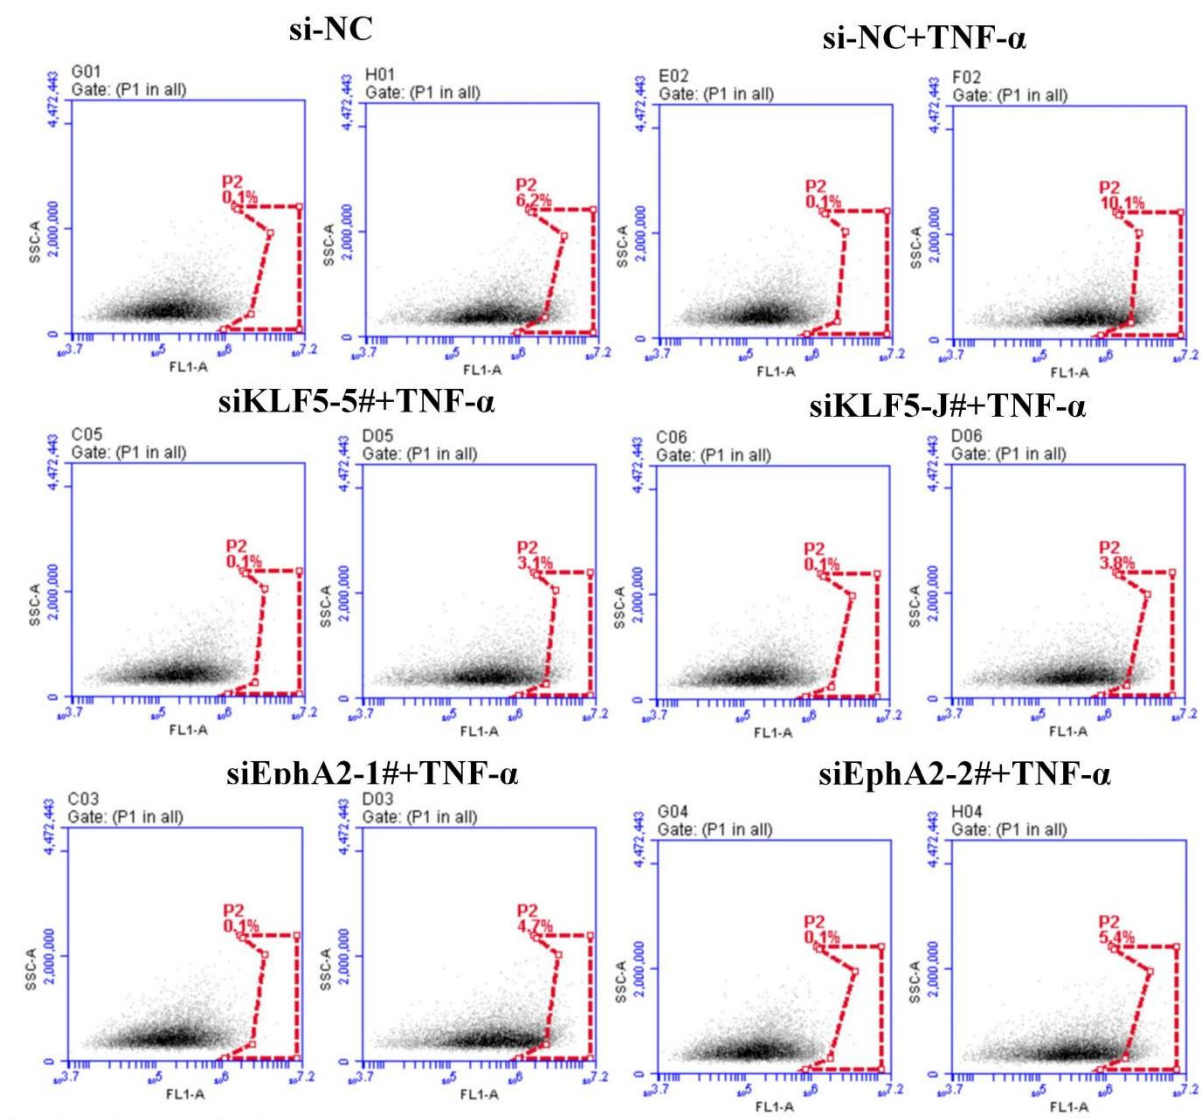

**Figure S7. Representative images for flow cytometry analysis for Figure 3B.**

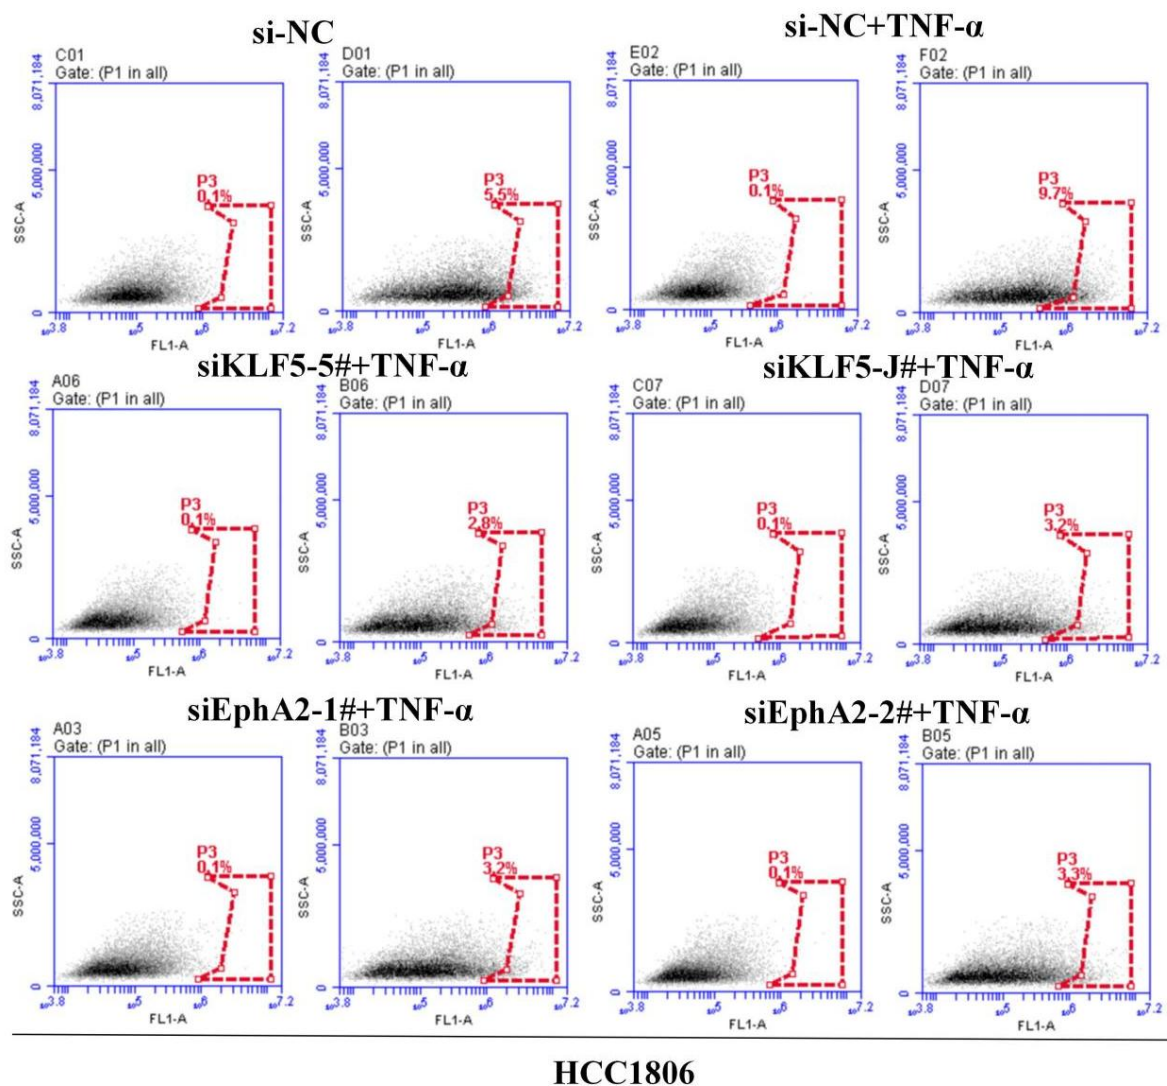

**Figure S8. Representative images for flow cytometry analysis for Figure 3C.**

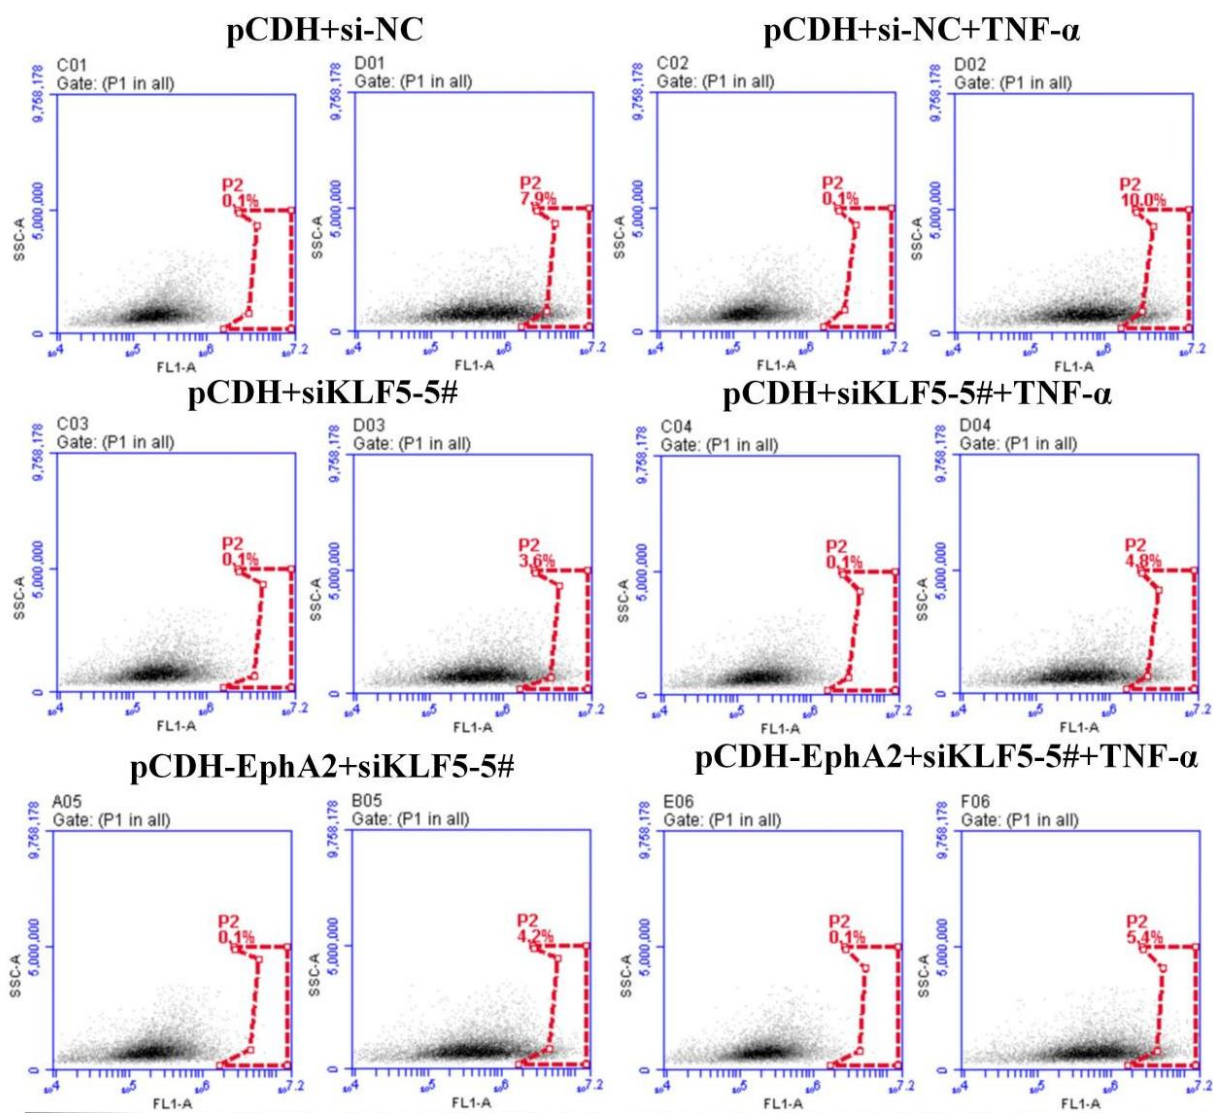

HCC1937

Figure S9. Representative images for flow cytometry analysis for Figure 3G.

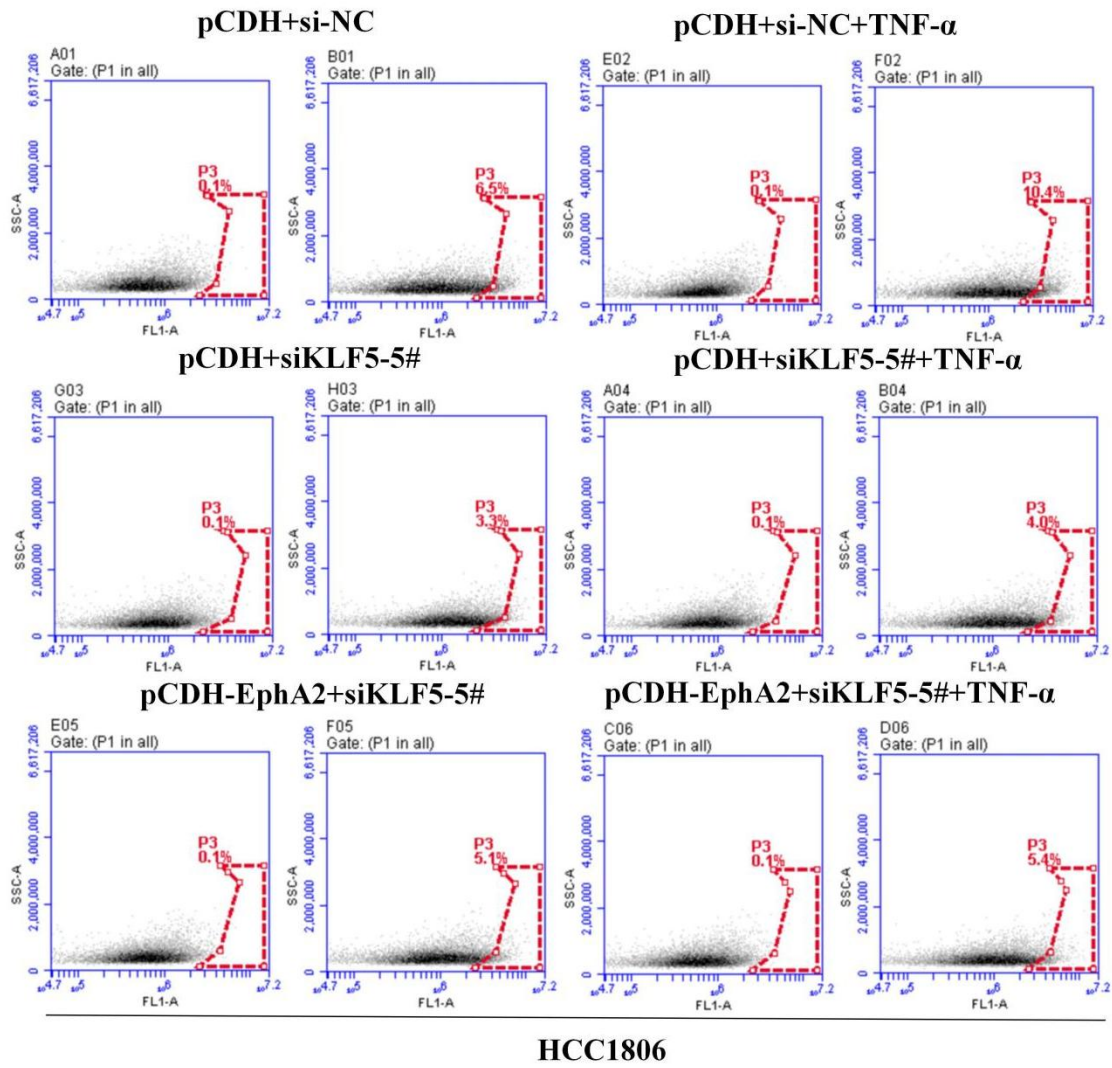

**Figure S10. Representative images for flow cytometry analysis for Figure 3H.**

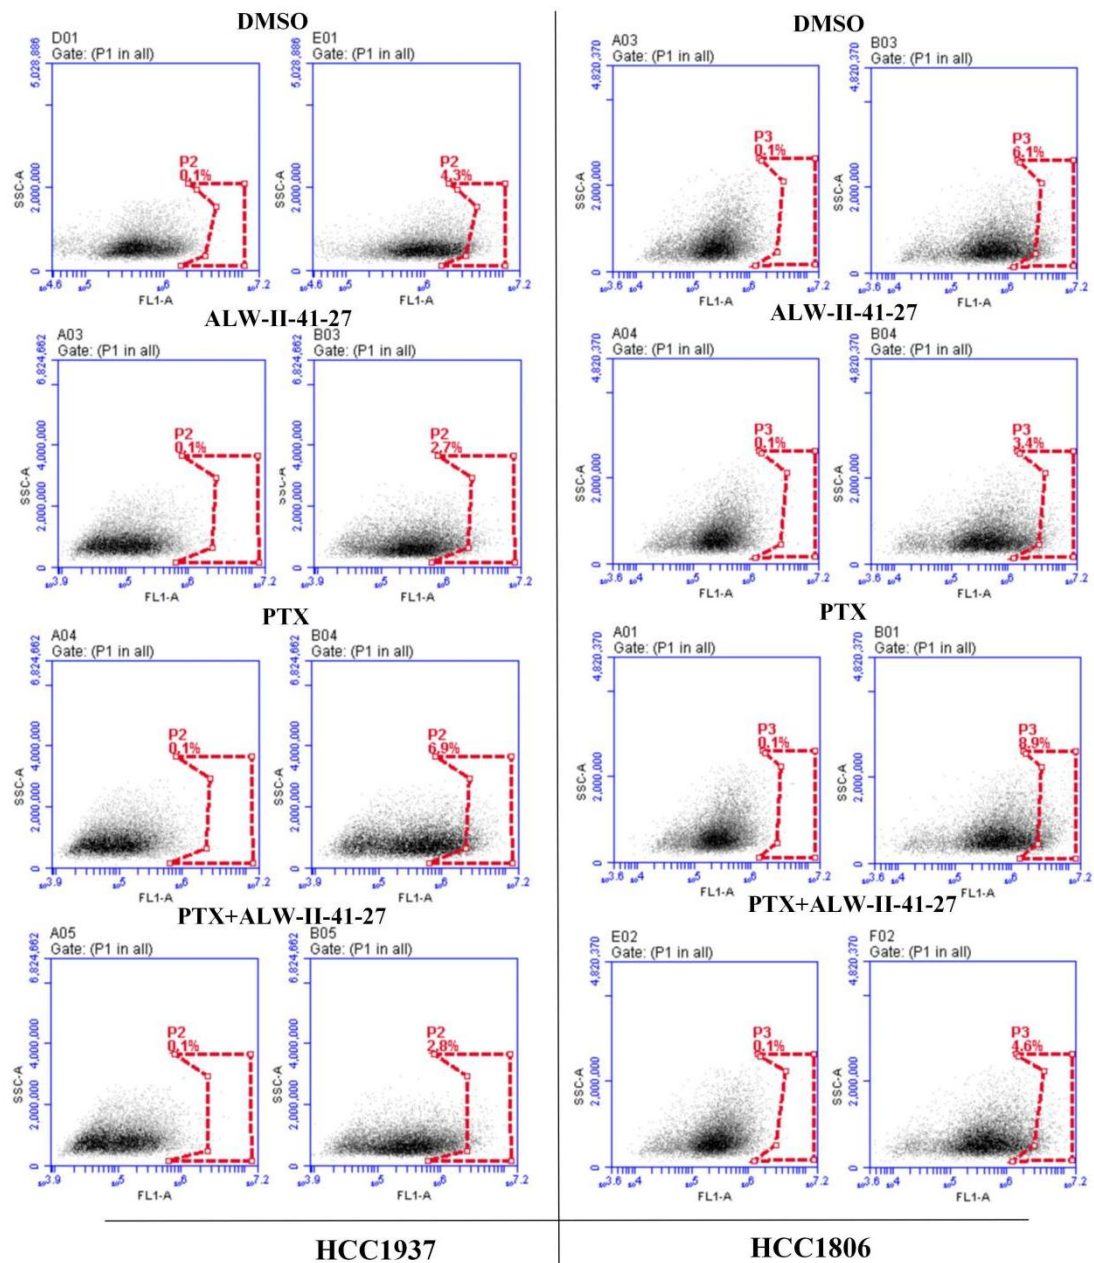

Figure S11. Representative images for flow cytometry analysis for Figure 4C.

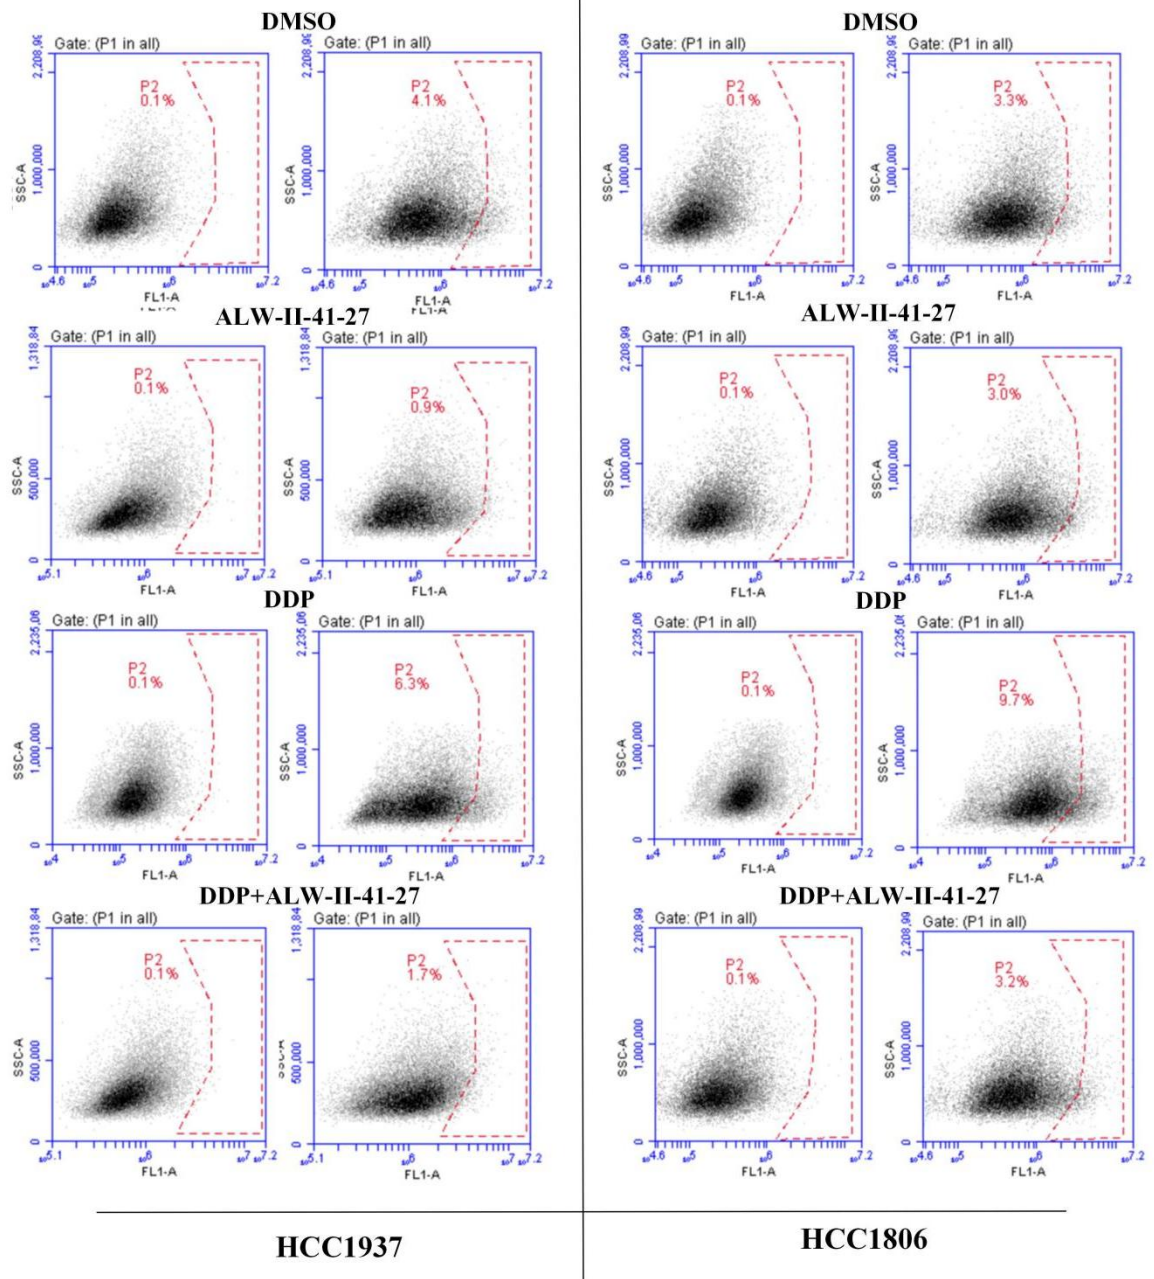

**Figure S12. Representative images for flow cytometry analysis for Figure 4D.**

## Supplementary Tables

**Table S1. Sequences of primers used in this paper.**

| Primers name                     | Sequences (5'-3')                                           |
|----------------------------------|-------------------------------------------------------------|
| EphA2 promoter WT forward primer | CCGTACCTCCGTCGGAGACCTCACCTCCGCCC TC                         |
| EphA2 promoter WT reverse primer | ACTGAGACACAGGGGCGATTG                                       |
| EphA2 promoter MT forward primer | CCGTACCTCCGTCGGAGACCTCACTTCTTATTTC C                        |
| EphA2 promoter MT reverse primer | ACTGAGACACAGGGGCGATTG                                       |
| P1 forward primer                | GGGCCCCACAATAGGTATCC                                        |
| P1 reverse primer                | AACATTGGCTTCCGTTCCCT                                        |
| P2 forward primer                | TTTTCCAAGGAACCTGCCTC                                        |
| P2 reverse primer                | CCAGAATTGAGGGGCATGGG                                        |
| Negative forward primer          | TTAAGGACTCGGGGCAGGAG                                        |
| Negative reverse primer          | ATCAGGTCCCCTTCCTTGC                                         |
| EphA2 forward primer             | GCAAAGGGTGGGACCTGATG                                        |
| EphA2 reverse primer             | TTGGTGCGGAGCCAGTTGT                                         |
| GAPDH forward primer             | CGACACCCACTCCTCCACCTT                                       |
| GAPDH reverse primer             | CCACCACCCTGTTGCTGTAGCC                                      |
| EphA2-siRNA1                     | GCAGCAAGGTGCACGAATT                                         |
| EphA2-siRNA2                     | GCTCAAGTTTACTGTACGT                                         |
| EphA2-siRNA3                     | GCAGGAGTTGGCTTCTTTA                                         |
| EphA2-shRNA1-F                   | CCGGGCCAGTTTAGCCACCACAATACTCGAGTA TTGTGGTGGCTAAACTGGCTTTTT  |
| EphA2-shRNA1-R                   | AATTCAAAAAGCCAGTTTAGCCACCACAATACT CGAGTATTGTGGTGGCTAAACTGGC |
| EphA2-shRNA2-F                   | CCGGCGAGGTCATGAAAGCCATCAACTCGAGTT GATGGCTTTCATGACCTCGTTTTT  |
| EphA2-shRNA2-R                   | AATTCAAAAACGAGGTCATGAAAGCCATCAAC TCGAGTTGATGGCTTTCATGACCTCG |

**Table S2. Clinical information for patients' response to NCT**

| BLBC ( NCT )                          | chemo-sensitive<br>(N=19) | chemo-resistant<br>(N=11) |
|---------------------------------------|---------------------------|---------------------------|
| Miller Payne 1 or PD                  | 0                         | 11                        |
| Miller Payne 4-5 or PCR               | 19                        | 0                         |
| Metastasis or recurrence ( 3 months ) | 0                         | 4                         |
| Used docetaxel                        | 19                        | 11                        |
| Used cisplatin                        | 3                         | 7                         |
| Used anthracycline                    | 19                        | 11                        |
| Used cyclophosphamide                 | 16                        | 9                         |
